1 **Genomics of sex allocation in the parasitoid wasp *Nasonia vitripennis***

2 Bart A. Pannebakker<sup>1\*</sup>, Nicola Cook<sup>2</sup>, Joost van den Heuvel<sup>1</sup>, Louis van de Zande<sup>3</sup> & David M.

3 Shuker<sup>2</sup>

4

5 1. Laboratory of Genetics, Wageningen University, Wageningen, The Netherlands

6 2. School of Biology, University of St Andrews, Fife, UK

7 3. Evolutionary Genetics, Development and Behaviour, Groningen Institute for Evolutionary

8 Life Sciences, University of Groningen, Groningen, The Netherlands

9 \* Correspondence: [bart.pannebakker@wur.nl](mailto:bart.pannebakker@wur.nl)

10

11

12

13

14 **Abstract**

15 *Background*

16 Whilst adaptive facultative sex allocation has been widely studied at the phenotypic level  
17 across a broad range of organisms, we still know remarkably little about its genetic  
18 architecture. Here, we explore the genome-wide basis of sex ratio variation in the parasitoid  
19 wasp *Nasonia vitripennis*, perhaps the best studied organism in terms of sex allocation, and  
20 well known for its response to local mate competition (LMC).

21

22 *Results*

23 We performed a genome-wide association study (GWAS) for single foundress sex ratios using  
24 iso-female lines derived from the recently developed outbred *N. vitripennis* laboratory strain  
25 HVRx. The iso-female lines capture a sample of the genetic variation in HVRx and we present  
26 them as the first iteration of the *Nasonia vitripennis* Genome Reference Panel (NVGRP 1.0).  
27 This panel provides an assessment of the standing genetic variation for sex ratio in the study  
28 population. Using the NVGRP, we discovered a cluster of 18 linked SNPs, encompassing 9  
29 annotated loci associated with sex ratio variation. Furthermore, we found evidence that sex  
30 ratio has a shared genetic basis with clutch size on three different chromosomes.

31

32 *Conclusions*

33 Our approach provides a thorough description of the quantitative genetic basis of sex ratio  
34 variation in *Nasonia* at the genome level and reveals a number of inter-related candidate loci  
35 underlying sex allocation regulation.

36

37 **Keywords**

38 local mate competition, *Nasonia*, oviposition, parasitoid wasp, sex allocation, genetic reference  
39 panel, single nucleotide polymorphism (SNP), genome-wide association study (GWAS), *Nasonia*

40

41

## 42 **Background**

43

44 The study of sex allocation is one of the most successful areas in evolutionary biology [1–3].

45 Theoretical predictions of optimal resource allocation to male and female offspring in

46 response to environmental conditions are now supported by a wealth of empirical data [1, 4–

47 9]. This is particularly true for Local Mate Competition (LMC) theory [10, 11]. Briefly, LMC

48 theory describes sex allocation dynamics when related males (including full siblings) compete

49 for mates in locally structured populations. When kin competition for mates is high, termed

50 local mate competition by Hamilton (1967), female-biased sex ratios, that limit kin

51 competition for mates and maximise the number of available mates for those competing

52 males, are favoured [12]. LMC is maximal when the male offspring from a single female

53 compete for mates (their sisters) on a discrete mating patch. When LMC is reduced, with

54 increasing numbers of unrelated males competing for mates, less female-biased sex ratios are

55 favoured. The logic of Hamilton's LMC theory extends to situations where females experience

56 environments that vary in the expected level of LMC amongst sons, for instance when different

57 numbers of females oviposit together on a patch. Facultative sex allocation is then predicted,

58 and has been shown in a diverse range of organisms, from malarial parasites to fig wasps [3,

59 13]. Perhaps the most extensive exploration of LMC theory has occurred in parasitoid wasps,

60 however, especially *Nasonia vitripennis* [14, 15].

61

62 Despite the success of sex allocation theory at the phenotypic level, we still know rather little

63 about the underlying mechanisms of sex allocation at the molecular level [16–19]. This is

64 important for at least three reasons. First, deviations in sex ratio from theoretical predictions

65 still remain [20] and require explanation. In *Nasonia vitripennis*, extending and testing basic

66 LMC theory has revealed that understanding how female parasitoids obtain and use  
67 information relating to the expected level of LMC their sons will experience can refine  
68 theoretical models and explain much of this variation [15, 21–25]. However, there is also LMC-  
69 independent genetic variation in sex allocation in *N. vitripennis* [19, 26–30]. Second, adaptive  
70 sex allocation provides an opportunity to explore the mechanisms underlying adaptation,  
71 including the genetic architecture and molecular evolution of a well-characterised trait (for  
72 recent discussions see for example; [31–36]). For instance, to what extent does genetic  
73 architecture constrain sex allocation? Third, phenotypic plasticity is at the heart of facultative  
74 sex allocation, and there has long been interest in how such plasticity is encoded in the  
75 genome [37]. Altogether, sex allocation is a well-characterised plastic trait, offering the  
76 opportunity to dissect the genetic basis of plasticity.

77

78 To date, studies on the genetic basis of sex ratio have focussed on quantitative genetic analysis  
79 across a range of organisms, including *Drosophila* [38, 39], ants [40], snails [41], fish [42],  
80 turtles [43], birds [44], pigs [45] and humans [46]. Several species of parasitoid wasp also  
81 show genetic variation for sex ratio [47–51], but most work has focused on *Nasonia vitripennis*  
82 [26–28, 30, 52]. More recently, mutation accumulation studies have explored how mutation  
83 augments additive genetic variation in sex ratio [16], suggesting that genes governing sex ratio  
84 are pleiotropic, also influencing other fitness-related traits. A linkage mapping study of sex  
85 ratio variation within a natural population of *N. vitripennis* identified a major quantitative trait  
86 locus (QTL) on chromosome 2 and three weaker QTL, one on chromosome 3 and two on  
87 chromosome 5. In addition, the QTL data revealed scope for pleiotropy between offspring sex  
88 ratio and clutch size [19]. Finally, recent work has explored patterns of gene expression  
89 associated with sex allocation in *Nasonia*. Thus far, patterns of differential gene expression  
90 associated with oviposition behaviour have been revealed in females, but there is no  
91 suggestion that the facultative response to LMC cues made during oviposition is associated

92 with any change in gene expression [17, 18, 53]. This suggests that, whilst oviposition is  
93 associated with changes in gene expression, phenotypically plastic sex allocation is not.  
94  
95 Here, in order to better understand the genomics of facultative sex allocation and oviposition,  
96 we extend our characterisation of the genetic basis of sex ratio variation in *N. vitripennis* with  
97 a genome-wide association study (GWAS) for single foundress sex ratios using iso-female lines  
98 derived from the recently developed outbred laboratory strain HVRx [54]. The iso-female lines  
99 capture a sample of the genetic variation in HVRx and we present them as the first iteration of  
100 the *Nasonia vitripennis* Genome Reference Panel (NVGRP 1.0). This panel provides an  
101 assessment of the standing genetic variation for sex ratio in the study population. Our  
102 approach provides a thorough description of the quantitative genetic basis of sex ratio  
103 variation in *Nasonia* and reveals a number of candidate molecular processes underlying sex  
104 allocation.

105

## 106 **Results**

### 107 *Molecular variation in NVGRP*

108 The NVGRP was constructed by isolating mated females from the HVRx outbred laboratory  
109 population, followed by 9 generations of inbreeding. 34 NVGRP lines were sequenced using  
110 Illumina HiSeq 2000, and the reads were mapped to the *N. vitripennis* reference genome. The  
111 mean sequence depth was 5.4X per line, with on average 230.2 Mb (96.47%) of the effective  
112 reference sequence covered per line (Supplementary Table 1). Using JGIL [55], which takes  
113 into account the expected allele frequencies after 9 generations of inbreeding from the  
114 outbred HVRx laboratory population, we called 205,691 SNPs. The residual heterozygosity in  
115 the NVGRP lines was low, on average the proportion of segregating SNPs across lines was  
116 2.68% (s.e.=0.35%), which is less than is theoretically expected after 9 generations of  
117 inbreeding (13% given an inbreeding coefficient of  $F=0.87$ ). The majority of the SNPs in the

118 NVGRP (96,920) are found in intergenic regions (Figure 1). 6,250 SNPs occur in the 5' UTR  
119 and 7086 in the 3' UTR sequences. In the coding regions, there are 12,344 synonymous SNPs  
120 and 6,723 nonsynonymous SNPs (6,634 missense and 89 nonsense SNPs), resulting in a  $d_N/d_S$   
121 ratio of 0.545.

122

### 123 *NVGRP population genetics*

124 We calculated the genome-wide polymorphism (Watterson's theta ( $\theta$ ) and nucleotide  
125 diversity ( $\pi$ )), both per chromosome, and in 400 kb non-overlapping windows (Figure 2,  
126 Supplementary Table 2). Averaged over the entire genome,  $\pi = 1.204e-03$  (s.e.= 2.841e-05),  
127 and  $\theta = 1.208e-03$  (s.e.= 2.823e-05). The average polymorphism differs per chromosome for  
128 both  $\pi$  ( $F_{4, 577}=3.047, P=0.017$ ) and  $\theta$  ( $F_{4, 577}=2.903, P=0.021$ ). Nucleotide diversity is higher  
129 towards the tips of the chromosomes (Figure 2). Comparison of the NVGRP to the HVRx  
130 source population shows similar levels of the nucleotide diversity ( $\pi$ ), indicating the 34  
131 NVGRP to be a good representation of the variation present in the source population.  
132 However, Watterson's theta ( $\theta$ ) is lower over all the NVGRP lines compared to HVRx,  
133 suggesting a loss of low frequency alleles, which is further reflected in the lower genome-wide  
134 Tajima's D values (Figure 2). Linkage disequilibrium (LD) decays to half the of the initial  
135 value in 17.8 kb (half-decay distance, Figure 3), with an average pairwise  $r^2$  value of 0.08  
136 (s.e.=0.0005). The extend of LD varies across and within the chromosomes. Some regions on  
137 chromosomes 1 and 3 exhibit half-decay distances over 8.9Mb and 36Mb respectively (Figure  
138 4). Pairwise  $F_{ST}$  values between the NVGRP lines were on average 0.309 (s.d. = 0.046) with a  
139 minimum of 0.145 and a maximum of 0.465. This indicates that inbreeding on the one hand  
140 has resulted in highly divergent lines, but, on the other hand, ample overlap in genetic  
141 variation still exists between all pairs of lines (i.e., we did not find lines completely divergent  
142 for all SNPs). Furthermore, the pairwise  $F_{ST}$  values did not correlate with the absolute

143 differences in sex ratio between lines selected for the GWAS (Spearman's  $r_s = -0.034$ ,  $P = 0.542$ )  
144 indicating that no correction for population structure in the GWAS is needed.

145

#### 146 *Sex ratio GWAS*

147 To exclude possible artefacts owing to differences in *Wolbachia* infection status, we only  
148 collected sex ratio data from NVGRP lines testing positive for *Wolbachia*-infection  
149 (Supplementary Figure 1). Among these, line 62 was a clear outlier, showing very male-biased  
150 sex ratios and low clutch sizes, indicative of a transient *Wolbachia* infection status  
151 (Supplementary Figure 2) resulting in within-line cytoplasmic incompatibility. We therefore  
152 excluded line 62 from further analysis. Across these 25 NVGRP lines, there was highly  
153 significant among-line variation in sex ratio (Binomial GLM:  $F_{24,918} = 15.244$ ,  $P < 0.0001$ ). This  
154 among-line variation represents a broad-sense heritability of  $H^2 = 0.106$  for sex ratio  
155 (Likelihood Ratio=56.176,  $P < 0.0001$ ). For clutch size, the 25 NVGRP lines showed a broad-  
156 sense heritability of  $H^2 = 0.078$  (Likelihood Ratio=36.61,  $P < 0.0001$ ). Among the NVGRP lines,  
157 our data showed a weak, non-significant negative correlation between sex ratio and clutch  
158 size (Supplementary Figure 3, linear regression:  $b = -0.0015$  (s.e.= 0.0008),  $t = -1.823$ ,  $P = 0.08$ ).

159

160 In total, 18 SNPs were significantly associated with sex ratio, according to our empirical FDR  
161 threshold of 0.1. (Figure 5, Table 1, Supplementary Table 3). These SNPs represent a single  
162 peak on chromosome 1 and show a high degree of linkage (mean  $r^2 = 0.97$ , Supplementary  
163 Table 4). All SNPs represent common variants, with an average minimal allele frequency  
164 (MAF) of 0.416. These 18 SNPs were associated with 9 annotated loci (Table 1). While the  
165 majority of the significant SNPs are predicted to either be intron variants (8) or upstream  
166 variants (7) of genes, we found two significant SNPs with a potential effect on the expression  
167 of the associated loci. NC\_015867.2\_30570243 is causing a synonymous change (p.Ala224Ala)  
168 in the splice region of exon 4 of *cilia- and flagella-associated protein 52* (CFAP52,

169 LOC100124028), while NC\_015867.2\_30604770 ( $P= 5.00 \cdot 10^{-7}$ ) is a variant in the 5'  
170 untranslated region (UTR) of *ADP-ribosylation factor-like protein 4C* (Arl4C, LOC100124030).  
171 We will discuss both these SNPs in more detail below.  
172  
173 We found no SNPs significantly associated with clutch size variation across the lines.  
174 However, despite this absence, we did detect significant enrichment of overlap between the *P*-  
175 values of the sex ratio and clutch size GWAS in 400kb windows on chromosomes 2, 3 and 5  
176 (Supplementary Figure 4). Most notably, two regions on chromosome 5, between 4,000kb –  
177 4,800kb and between 8,400kb – 8,800kb show enriched overlap in test statistics, indicating a  
178 shared genetic background for these two traits (Figure 5). Although our finding of 18 strongly  
179 linked variants in the same genomic region suggests that the number of variants in the NVGRP  
180 segregating for sex ratio is limited, this overlapping background of sex ratio with clutch size  
181 on three different chromosomes, in addition to the a large number of sub-significant peaks for  
182 sex ratio throughout the genome, suggests that sex allocation is a complex trait with polygenic  
183 regulation and epistatic interactions.  
184  
185  
186  
187



## 188 **Discussion**

189 Sex allocation has been extensively studied at the phenotypic level, especially in species such  
190 as parasitoid wasps. However, our understanding of the genetic architecture of the  
191 mechanisms associated with sex allocation is much more rudimentary. Here we have shown  
192 that at least 18 single nucleotide polymorphisms are associated with variation in sex  
193 allocation across experimental lines drawn from a single population. While only a single peak  
194 significantly passed the genome-wide threshold, both the presence of a large number of  
195 subsignificant peaks (Figure 5) , and evidence of an overlapping genetic background on  
196 chromosome 5, confirm the polygenic nature of the genetic variation in sex allocation in  
197 *Nasonia*. While the emerging picture is that variation in most complex traits is typically  
198 influenced by a large number of loci with pleiotropic alleles, polygenic traits represent a major  
199 challenge in terms of understanding the molecular genetic basis of phenotypes and their  
200 adaptive evolution [36]. This is the case in terms of both understanding how interactions  
201 among DNA sequences constrain or promote the production of adaptive phenotypes, and also  
202 in terms of reconstructing the path evolution has taken at the molecular level, including  
203 identifying key substitutions. Put simply, we are likely to have an embarrassment of riches,  
204 although even then, we may well only be able to discover a fraction of evolutionarily relevant  
205 SNPs [32]. Moreover, unlike candidate gene approaches, we are often faced with genes or  
206 putative regulatory sequences about which we know little or nothing, either through a lack of  
207 annotation, or through the lack of a clear link between proposed gene ontology and the  
208 phenotype of interest. In our case, the 18 SNPs on chromosome 1 that are associated with sex  
209 ratio variation among our lines, have predicted effects on 9 annotated loci.

210

211 Of these, two significant SNPs are predicted to have an effect on the expression of the loci they  
212 are associated with. NC\_015867.2\_30570243 ( $P=1.12*10^{-6}$ ) is a variant causing a synonymous  
213 change (p.Ala224Ala) in the splice region of exon 4 of *cilia- and flagella-associated protein 52*

214 (CFAP52, LOC100124028). CFAP52 is highly conserved and its human ortholog, WDR16,  
215 occurs in sperm tails [56]. Furthermore, human low-motility sperm shows low expression of  
216 this testis specific transcript WDR16 [57]. While no direct studies have been done into the  
217 role of CFAP52 in *Nasonia* sperm, CFAP52 shows high expression levels in *N. vitripennis* testis  
218 [58, 59]. Because of its role in sperm motility, splice region changes could affect the  
219 functionality of CFAP52 and therefore directly impact sex allocation in the haplodiploid *N.*  
220 *vitripennis*, in which fertilization is the key trigger to female development [60]. Results such as  
221 these would help explain the small influence of males in sex allocation observed in *N.*  
222 *vitripennis* [61]. The observed variation among strains in sex ratio could well be due to  
223 differences in male ejaculate quality and fertilization success. Such variation in male fertility  
224 might also explain why the observed single foundress sex ratios are slightly higher (i.e. more  
225 males) than we might expect from the number of females a single male can inseminate, and  
226 would act as a form of 'fertility insurance' [3, 62]. Whether the splice region variant CFAP52  
227 observed in the NVGRP can account for such variation requires a more thorough  
228 characterization of the potential mis-splicing and is outwith the scope of the present study  
229 [63].

230

231 The other SNP that may well influence gene expression is NC\_015867.2\_30604770 ( $P=$   
232  $5.00 \times 10^{-7}$ ). This is a variant in the 5' untranslated region (UTR) of *ADP-ribosylation factor-like*  
233 *protein 4C* (Arl4C, LOC100124030), but does not generate a premature start codon. The 5'  
234 UTR is the mRNA region directly upstream from the start codon and plays a role in the  
235 regulation of transcript translation. While it is hard to predict the exact effect of a 5' UTR  
236 variant in a non-model system, 5' UTR variants can affect the translation efficiency and hence  
237 the expression level of proteins [64]. Arl4 are group of proteins that belongs to the family of  
238 ADP-ribosylation factors, which are involved in the regulation of vesicular trafficking  
239 processes [65]. Arl4C has been implicated in the regulation of vesicular traffic of cholesterol

240 and of transferrin in endosomes [66] and likely plays a similar role as the related Arl4A [67].  
241 Interestingly, Arl4A is strongly expressed in adult testis in mice [68] and targeted disruption  
242 of Arl4A resulted in a reduced sperm count [69]. More functional studies are needed to  
243 determine if Arl4C also plays a role in *Nasonia* spermatogenesis, and whether the identified 5'  
244 UTR variant affects Arl4C expression and alters the *Nasonia* sex ratio phenotype, again via  
245 effects on sperm quality or quantity.

246  
247 While no significant SNPs were found for clutch size, we did detect significant enrichment of  
248 overlap between the *P*-values of the sex ratio and clutch size GWAS in 400kb windows on  
249 chromosomes 2, 3 and 5, with those on chromosome 5 providing the strongest evidence (i.e.  
250 *P*-values were non-randomly associated with each other for the two traits across these  
251 regions, whereas there should be no association if there is no shared genetic basis: Figure 5,  
252 Supplementary Figure 4). This overlap indicates a shared genetic basis for the two traits,  
253 compatible with theoretical predictions on the genetic basis of sex ratio. Based on the  
254 observed natural variation and estimates of mutational parameters for sex ratio, the genetic  
255 variation for sex ratio is predicted to be maintained by selection on pleiotropic loci with  
256 effects on other fitness related traits [16]. While clutch size is only one of many fitness-related  
257 traits that can show pleiotropy with sex ratio, a correlation between these two traits is also  
258 expected from theoretical work. In the case of a single foundress per host, LMC theory  
259 predicts that a mother should only produce enough sons to mate with all of her daughters  
260 [10]. For small clutch sizes, this can be a single male, and when clutch size increases, an  
261 increasingly male-biased sex ratio is predicted [20, 70, 71]. Interestingly, our previous  
262 analysis of the quantitative genetic basis of sex ratio and clutch size in different Dutch *N.*  
263 *vitripennis* strains, also identified overlapping QTLs for both traits on chromosomes 2 and 5  
264 on a recombination linkage map [72]. Unfortunately, of the eight microsatellite markers  
265 associated to the sex ratio in the QTL study, only two could be found on the same

266 chromosomes in the current assembly (Nvit\_2.1). The other six are located on unlocalized  
267 scaffolds (data not shown), making a direct comparison between these studies difficult and  
268 indicating the need for a further improved genome assembly for this species [73].

269

270 In addition to revealing some of the molecular genetic variants associated with sex allocation  
271 in *Nasonia*, we have also presented a new genomic resource for the community. Since the  
272 publication of the *Nasonia* genome in 2010 [74], there has been a steadily growing number of  
273 studies of the molecular genetics of a range of phenotypes, deploying a number of techniques  
274 [73, 75–81]. In terms of our own work on sex allocation, we have shown for example that  
275 facultative sex allocation under LMC is not associated with changes in gene expression [17,  
276 18], even though female oviposition of eggs is associated with major changes to the  
277 transcriptome (in particular, a down-regulation of metabolic processes: [17, 53]). We have  
278 also shown though that disrupting patterns of DNA methylation changes the pattern of  
279 facultative sex allocation [82, 83], suggesting that the regulation of gene expression via DNA  
280 methylation is important for facultative sex allocation.

281

282 Our first iteration of a proposed *Nasonia vitripennis* Genome Reference Panel (NVGRP 1.0)  
283 currently consists of 34 iso-female lines generated from wasps collected from one population,  
284 of which 25 lines comprised the GWAS for sex ratio presented here. Whilst the number of  
285 lines is currently modest, we have nonetheless captured SNPs associated with sex ratio;  
286 moreover, the NVGRP lines exhibit significant broad-sense heritabilities for a range of traits,  
287 not just sex ratio, including total lifetime fecundity, longevity, head width, wing length, and  
288 starvation resistance ( $H^2 = 0.13-0.58$ ; B.A. Pannebakker, unpublished observations).

289 Importantly, as a species characterised by sib-mating, and thus inbreeding, the creation of iso-  
290 female lines in *Nasonia* does not suffer the problems associated with the inbreeding of natural  
291 out-crossers [84], and so we do not see great reductions in fitness in our inbred lines. The

292 effect of sib-mating is reflected in the relatively slow decay of linkage disequilibrium ( $r^2 < 0.1$  at  
293 160.2kb, and  $r^2 < 0.2$  at 71.2kb) as is also observed in selfing plants (e.g. rice *Oriza sativa*,  $r^2$   
294  $< 0.1$  at 75-150kb [85] or soy *Glycine max*  $r^2 < 0.1$  at 90-500kb [86]). Other insects, such as  
295 *Drosophila melanogaster* and *Apis mellifera*, show much shorter distances at which LD decays  
296 ( $r^2 < 0.2$  at 10 bp and  $r^2 < 0.2$  at 1kb respectively, [87, 88]).

297

298 The extent of LD in the NVGRP lines does show large variation within and across  
299 chromosomes, which likely reflects the observed variation in recombination rates in *Nasonia*  
300 [89–91]. In direct observations of recombination events from markers segregating in a cross,  
301 areas of low recombination were observed near the centre of the chromosomes [89, 90]. The  
302 NVGRP shows areas of high LD, but not just at chromosome centres. The LD estimates in the  
303 NVGRP, however, are population estimates, integrating historical recombination events that  
304 could result in a different pattern than from the present-day recombination estimates  
305 observed in the progeny from a cross [92]. To what extent natural inbreeding, or other  
306 demographic factors such as the limited population size of NVGRP, is driving the slow decay of  
307 linkage disequilibrium and the observed variation in LD in *Nasonia*, requires further  
308 genotyping of additional samples from wild populations.

309

## 310 **Conclusions**

311 We present the first iteration of the *Nasonia vitripennis* Genetic Reference Panel as a  
312 community resource for the analysis of complex traits. We found substantial variation for sex  
313 allocation in the NVGRP and identified 18 SNPs associated with variation in sex allocation and  
314 found evidence for overlapping genetic background of sex ratio with clutch size on different  
315 chromosomes. As our data represent only a sample of the standing genetic variation in our  
316 study population, it is likely that we have missed other variants that influence sex ratio  
317 variation segregating in that population, but we have nonetheless provided the first genomic  
318 visualization of the heritability of sex ratio observed in this and other studies on *Nasonia* [16,  
319 26, 28].

320

321 Wild *N. vitripennis* populations show rather limited population genetic structure across  
322 Europe, which perhaps explains our ability to capture significant genetic variation with only a  
323 comparatively small sample of lines from one population [93, 94]. Nevertheless, we recognise  
324 that the study presented here is as much a proof-of-principle for exploring the molecular  
325 genetic basis of sex allocation in *Nasonia* as anything else, and an expansion of the NVGRP is  
326 certainly required. However, we note that as whole-genome sequencing becomes ever  
327 cheaper and alternative genotyping methods are developed (such as RAD sequencing and  
328 other genotype-by-sequencing techniques [95, 96]), the role of reference panels may change.  
329 Shifting from the main focus of a study, they can provide supporting genomic resources, or  
330 genetic hypotheses to test, for studies that interrogate genetic variants in the wild more  
331 directly [97–100].

332

## 333 **Methods**

### 334 *Study Organism*

335 *Nasonia vitripennis* (Hymenoptera, Chalcidoidea) is a generalist parasitoid of large dipteran  
336 pupae, including species of Calliphoridae. Depending on host species, females oviposit  
337 between 20-50 eggs in an individual host, with male offspring emerging just before females  
338 (after approximately 14 days at 25°C; [101]). Male individuals are brachypterous and are  
339 unable to fly, remaining close to the emergence site where they compete with each other for  
340 emerging females, including their sisters. Females disperse after mating to locate new hosts.  
341 As with all Hymenoptera, *N. vitripennis* is haplodiploid, with diploid females developing from  
342 fertilised eggs, and haploid males developing from unfertilised eggs. Sex allocation is  
343 therefore associated with females controlling the fertilisation of eggs during oviposition,  
344 releasing stored sperm from the spermatheca to fertilise eggs as they pass down the oviduct.  
345 Unless otherwise specified, wasps were reared on *Calliphora* spp. hosts at 25°C, 16L:8D light  
346 conditions.

347

### 348 *Base population*

349 We used the HVRx outbred population of *N. vitripennis* [54] as the base population for our  
350 selective breeding experiment and as the source population for our iso-female inbred lines for  
351 our genome-wide phenotypic association study. This line was created from wild caught wasps  
352 collected from Hoge Veluwe National Park in the Netherlands and is maintained as large  
353 outbred population at an effective population size of  $N_e > 200$ .

354

### 355 *The Nasonia vitripennis Genome Reference Panel 1.0*

#### 356 *NGRP lines*

357 Iso-female lines were established by randomly collecting 105 virgin females from the HVRx  
358 outbred population at HVRx generation 45 [54], which were individually provided with two

359 hosts for two days at 25°C to produce male offspring. Mothers were stored at 4°C and crossed  
360 back to one of her sons (mother-son mating) upon emergence of the male offspring. Mated  
361 females were provided with two hosts for two days at 25°C to produce male and female  
362 offspring. These lines were inbred by 8 generations of full-sib mating to produce 34 stable  
363 inbred lines, followed by random mating. This resulted in an inbreeding coefficient of  $F=0.87$ ,  
364 equivalent of 10 generations of diploid full-sib matings.

365

366

### 367 *Genome resequencing*

368 DNA was isolated from 60 pooled females at generation 29 for each of the 34 stable inbred  
369 lines, using a standard high salt–chloroform protocol [102]. Library construction and genome  
370 sequencing were performed by BGI Tech Solutions according to standard Illumina protocols.  
371 For each inbred line, a 91bp paired-end library was constructed and the libraries were run on  
372 an Illumina HiSeq 2000 (Illumina, San Diego, CA, USA). Clean reads were aligned to the  
373 *Nasonia vitripennis* genome build Nvit\_2.1 (GCF\_000002325.3, downloaded from the NCBI  
374 FTP site:  
375 [ftp://ftp.ncbi.nlm.nih.gov/genomes/all/GCF/000/002/325/GCF\\_000002325.3\\_Nvit\\_2.1](ftp://ftp.ncbi.nlm.nih.gov/genomes/all/GCF/000/002/325/GCF_000002325.3_Nvit_2.1))  
376 using BWA v0.6.2-r126 [103]. Duplicated reads were filtered out using samtools v0.1.18 [104]  
377 and alignments were generated as BAM files for further analysis. Assembled data have been  
378 submitted to the NCBI Short Read Archive in BioProject no. PRJNA387118 and with accession  
379 no. SRP107298. SNPs were called for each line simultaneously using the Joint Genotyper for  
380 Inbred Lines (JGIL) v1.6 [55] using the following parameters: read mapping quality threshold:  
381 10, number of generations: 10. SNPs with a quality less than 20 were ignored, and the  
382 genotypes of any individual for which the SNP quality score was less than 10 were treated as  
383 missing genotypes. SNP data were stored as VCF and have been deposited in the EMBL



384 European Variation Archive in Project no. PRJEB33514 with analysis accession no.  
385 ERZ1029220.

386

387 *Population genomics*

388 For the estimation of nucleotide diversity ( $\pi$ ) and Tajima's  $D$ , BAM files resulting from the  
389 above described analysis were merged (samtools merge) separately for the HVRx outbred  
390 population bam files and the inbred line bam files to produce one outbred BAM file and one  
391 inbred bam file. BAM files were combined without a priori coverage correction. From these  
392 BAM files, pileup files were produced (samtools mpileup) and subsampled to standardize the  
393 coverage at 20X using subsample-pileup.pl of PoPoolation [105] and the following settings  
394 target-coverage 20, max-coverage 400, min-qual 20, method withreplace. These subsampled  
395 pileup files, were used to estimate the nucleotide diversity ( $\pi$ ) and Tajima's  $D$  in sliding  
396 windows using variance-sliding.pl of PoPoolation [105] and the following settings pool-size  
397 60, min-count 5, min-coverage 10, min-covered-fraction 0.5, fastq-type sanger, window-size  
398 400000, step-size 200000.

399 Linkage disequilibrium ( $r^2$ ) was estimated between all pairs of SNPs within a distance  
400 of 1 MB using the VCF resulting from the JGIL SNP calling pipeline of the inbred lines as input.  
401 To estimate LD decay, we fitted the equation  $r^2 = 1/(1+px)$  for every focal SNP (using nls  
402 method, [106] where x denotes the distance to every other SNP 1MB up- and 1MB down-  
403 stream of the focal SNP. After the value for p was retrieved for every SNP, the distance at  
404 which LD equal 0.5 was estimated by  $(1/p)$ . Then these values were plotted against the  
405 position of the SNPs to get an indication of LD variation in the genome. To determine the need  
406 for correction based on population structure, we determined the significance of the  
407 correlation between pairwise  $F_{ST}$  values over all SNPs called in the JGIL pipeline and pairwise  
408 absolute Euclidian distance in sex ratio for the 26 lines included in the GWAS (see below)  
409 using Spearman's rank correlation. When correlated with the phenotype, population structure

410 can result in false positives in GWAS analyses, requiring a correction based on the relatedness  
411 of the samples [107].

412

413 *Wolbachia detection*

414 *Nasonia vitripennis* can be infected with the maternally inherited bacterium *Wolbachia*  
415 *pipentis*, which affects reproduction. To be able to account for the effects of *Wolbachia*, the  
416 NGRP lines were assessed for *Wolbachia* infection in generation 31 after initial inbreeding  
417 using a PCR assay for the *Wolbachia* specific *wsp* gene (81F/691R primers; [108]. PCR  
418 conditions were denaturation at 94 °C for 3 min, then 35 cycles of 94 °C for 1 min, 55 °C for 1  
419 min, 72 °C for 1 min and a final extension at 72 °C for 5 min. PCR products were visualized on  
420 a 1% agarose gel stained with ethidium bromide.

421

422 *Iso-female line GWAS*

423 The focal females used in this experiment were from 26 *Wolbachia*-positive NVGRP lines. At  
424 the point of phenotyping associated with this experiment, these lines had been mass-reared  
425 for 36 generations after initial inbreeding.

426

427 To control for possible host and other maternal effects, we isolated 40 females (2 day old,  
428 mated) from the mass culture of each of the 26 lines into individual glass vials and provided  
429 each with three hosts. We then used 40 females from the resulting F1 generation in the  
430 experiment, one female per “grandmother”, per line. These experimental females (2 day old,  
431 mated) were isolated into individual glass vials and provided with a single host for 24 hours  
432 as a pre-treatment to facilitate egg development. Pre-treatment hosts were discarded, and  
433 each female given a piece of filter paper soaked in honey solution for a further 24 hours.  
434 Subsequently, we gave experimental females access to three hosts for a period of 24 hours.  
435 One-way escape tubes were fitted to the glass vials after 1-hour had passed to allow females

436 to disperse, preventing unnatural levels of superparasitism. Hosts were incubated and we  
437 counted and sexed the emerging offspring to calculate sex ratio. In total, we phenotyped  
438 57,465 wasps in 958 broods (mean clutch size=60.04).

439

440 We analysed the variation in sex ratio in two steps. First, we fitted a Generalised Linear Model with  
441 binomial error structure and a logit link function to test for significant differences in sex ratio  
442 between the iso-female lines. To correct for over-dispersion, common when analysing  
443 binomial data,  $F$ -tests were used. Second, we determined the between iso-female line  
444 variation using linear mixed-effect models on arcsine square root transformed data for sex ratio, and  
445 untransformed data for clutch size. Iso-female line was fitted as a random effect and variance  
446 components were estimated by REML. This isofemale line analysis estimates the genetic  
447 variation as the broad-sense heritability  $H^2$  [51, 109–111]. All statistical analyses were  
448 carried out in R [106].

449

#### 450 *Genotype-phenotype associations*

451 To identify SNPs significantly associated with single-foundress sex ratio, we performed single  
452 marker regressions for all SNPs on each chromosome segregating between iso-female lines  
453 using a general linear mixed effect model. SNPs segregating within lines were treated as  
454 missing data. SNPs were excluded if the allele count was less than 3. A Generalized Linear  
455 Mixed Model was implemented using the `glmer` function in the `lme4` package [112] in R [106],  
456 with sex ratio as the response variable, genotype as the explanatory variable, and line as a  
457 random effect. We used a binomial error structure and a logit link function.  $P$ -values for the  
458 significance of the association between single-foundress sex ratio and each SNP were  
459 obtained. Significance thresholds were estimated by permutating iso-female line identity for  
460 each SNP. The permuted dataset was then used to estimate an empirical threshold using a  $q$ -

461 value of 0.1 as significant, which resulted in an empirical threshold of  $P=2.00 \times 10^{-6}$ , or –  
462  $\log_{10}(P)= 5.70$  for sex ratio.

463

464 Similar single marker regressions using a linear mixed model were performed for clutch size,  
465 using the lmer function in the lme4 package [112] in R [106], with clutch size as the response  
466 variable, genotype as the explanatory variable, and line as a random effect. To determine  
467 significance thresholds for clutch size, we permuted iso-female line identity for each SNP.  
468 Because the minimum q-value was 0.463, no variant was considered significant for clutch  
469 size.

470

471 To determine the scope for a shared genetic background, we determined the overlap in test  
472 statistics between sex ratio and brood size in 400 kb windows per chromosome. To do this,  
473 we calculated the overlap in SNPs for an increasing rank in p-values. We then performed the  
474 SuperExact test in the SuperExactTest package [113] in R on this overlap for each cutoff  
475 obtained observed p-values. Because genome structure can have an effect on the result,  
476 mainly through variation in the number of SNPs in each window, we also performed the same  
477 analyses on 100 randomized sites where SNP identity was permuted. Windows were  
478 considered significant if the observed p-value was lower than any of the 100 permuted  
479 ones. We used an increasing windows size of 25, 50, 100, 200 and 400 KB windows  
480 (Supplementary Figure 4).

481

#### 482 *Identification of candidate genes*

483 To identify candidate genes, we annotated the VCF file with SnpEff v4.3b [114] based on the  
484 NCBI *Nasonia vitripennis* Annotation Release 102  
485 ([https://www.ncbi.nlm.nih.gov/genome/annotation\\_euk/Nasonia\\_vitripennis/102/](https://www.ncbi.nlm.nih.gov/genome/annotation_euk/Nasonia_vitripennis/102/)).

486 Candidate SNP positions and their effects were filtered from the annotated VCFs using SnpSift  
487 v4.3b [114].  
488  
489  
490

491

492 **Declarations**

493 *Acknowledgements*

494 We would like to thank Gabriella Bukovinszkine Kiss, Bertha Koopmanschap and Jade Green  
495 for their help in the laboratory, and Eveline Verhulst for her insightful comments on the  
496 molecular biology of sex determination.

497

498 *Funding*

499 This research was funded by the Netherlands Genomics Initiative (Zenith 93511041) and the  
500 by the Natural Environment Research Council (NE/J024481/1).

501

502 *Availability of data and material*

503 Raw DNA sequencing reads deposited in NCBI with the project accession of PRJNA387118.  
504 SNP data were stored as VCF and have been deposited in the EMBL European Variation  
505 Archive (EVA) in Project no. PRJEB33514 with analysis accession no. ERZ1029220. The  
506 NVGRP iso-female lines are available upon request from the lab of Bart Pannebakker

507

508

509

510

511 *Authors' contributions*

512 BAP, LvdZ and DMS conceived the study. NC performed the sex ratio experiments, BAP, NC  
513 and JvdH performed the statistical and sequence analyses. BAP and DMS wrote the manuscript.  
514 All authors read and approved the final manuscript.

515

516 *Competing interests*

517 The authors declare that they have no competing interests.

518

519 *Consent for publication*

520 Not applicable.

521

522 *Ethics approval and consent to participate*

523 Not applicable.

524

525

526 **References**

527

528 1. Charnov EL. The theory of sex allocation. Princeton, NJ: Princeton Univ Press; 1982.

529 2. Herre EA. Optimality, plasticity and selective regime in fig wasp sex ratios. *Nature*.

530 1987;329:627–9.

531 3. West SA. Sex Allocation. Princeton, NJ: Princeton Univ Press; 2009.

532 4. Hamilton WD. Narrow roads of gene land : the collected papers of W.D. Hamilton. Oxford ;

533 W.H. Freeman/Spektrum; 1996.

534 5. West SA, Shuker DM, Sheldon BC. Sex-ratio adjustment when relatives interact: A test of

535 constraints on adaptation. *Evolution (N Y)*. 2005;59:1211–28.

536 6. FRANK SA. Foundations of Social Evolution. Princeton University Press; 2019.

537 7. Hardy ICW, editor. Sex Ratios. Cambridge: Cambridge University Press; 2002.

538 doi:10.1017/CBO9780511542053.

539 8. Macke E, Magalhães S, Bach F, Olivieri I. Experimental evolution of reduced sex ratio

540 adjustment under local mate competition. *Science (80- )*. 2011;334:1127–9.

541 9. Macke E, Olivieri I, Magalhães S. Local mate competition mediates sexual conflict over sex

542 ratio in a haplodiploid spider mite. *Curr Biol*. 2014;24:2850–4.

- 543 doi:10.1016/j.cub.2014.10.040.
- 544 10. Hamilton WD. Extraordinary Sex Ratios. *Science* (80- ). 1967;156:477–88.
- 545 doi:10.1126/science.156.3774.477.
- 546 11. Hamilton WD. Reproductive Competition and Sexual Selection in Insects. In: Blum MS,
- 547 Blum NA, editors. *Sexual Selection and Reproductive Competition in Insects*. New York:
- 548 Academic Press; 1979. p. 167–220.
- 549 12. Taylor PD, Bulmer MG. Local mate competition and the sex ratio. *J Theor Biol.*
- 550 1980;86:409–19. doi:10.1016/0022-5193(80)90342-2.
- 551 13. Reece SE, Drew DR, Gardner A. Sex ratio adjustment and kin discrimination in malaria
- 552 parasites. *Nature*. 2008;453:609–14. doi:10.1038/nature06954.
- 553 14. Godfray HCJ. *Parasitoids : behavioral and evolutionary ecology*. Princeton, N.J. SE - 473
- 554 pages : illustrations ; 25 cm.: Princeton University Press; 1994.
- 555 15. Burton-Chellew MN, Koevoets T, Grillenberger BK, Sykes EM, Underwood SL, Bijlsma K, et
- 556 al. Facultative sex ratio adjustment in natural populations of wasps: cues of Local Mate
- 557 Competition and the precision of adaptation. *Am Nat*. 2008;172:393–404.
- 558 16. Pannebakker BA, Halligan DL, Reynolds KT, Ballantyne GA, Shuker DM, Barton NH, et al.
- 559 Effects of spontaneous mutation accumulation on sex ratio traits in a parasitoid wasp.
- 560 *Evolution* (N Y). 2008;62:1921–35.
- 561 17. Cook N, Trivedi U, Pannebakker BA, Blaxter M, Ritchie MG, Tauber E, et al. Oviposition but
- 562 not sex allocation is associated with transcriptomic changes in females of the parasitoid wasp
- 563 *Nasonia vitripennis*. *G3 Genes, Genomes, Genet*. 2015;5:2885–92.
- 564 18. Cook N, Boulton RA, Green J, Trivedi U, Tauber E, Pannebakker BA, et al. Differential gene
- 565 expression is not required for facultative sex allocation: A transcriptome analysis of brain
- 566 tissue in the parasitoid wasp *nasonia vitripennis*. *R Soc Open Sci*. 2018;5.
- 567 19. Pannebakker BA, Watt R, Knott SAA, West SA, Shuker DMM. The quantitative genetic basis
- 568 of sex ratio variation in *Nasonia vitripennis*: A QTL study. *J Evol Biol*. 2011;24.



- 569 20. West SA, Herre EA. Stabilizing selection and variance in fig wasp sex ratios. *Evolution* (N  
570 Y). 1998;52:475–85.
- 571 21. Flanagan KE, West SA, Godfray HCJ. Local mate competition, variable fecundity and  
572 information use in a parasitoid. *Anim Behav.* 1998;56:191–8.
- 573 22. Shuker DM, West SA. Information constraints and the precision of adaptation: Sex ratio  
574 manipulation in wasps. *Proc Natl Acad Sci U S A.* 2004;101:10363–7.
- 575 23. Shuker DM, Pen I, Duncan AB, Reece SE, West SA. Sex ratios under asymmetrical local mate  
576 competition: Theory and a test with parasitoid wasps. *Am Nat.* 2005;166:301–16.
- 577 24. Shuker DM, Pen I, West SA. Sex ratios under asymmetrical local mate competition in the  
578 parasitoid wasp *Nasonia vitripennis*. *Behav Ecol.* 2006;17:345–52.
- 579 25. Ivens ABF, Shuker DM, Beukeboom LW, Pen I. Host acceptance and sex allocation of  
580 *Nasonia* wasps in response to conspecifics and heterospecifics. *Proc R Soc B Biol Sci.*  
581 2009;276:3663–9.
- 582 26. Parker ED, Orzack SH. Genetic variation for the sex ratio in *Nasonia vitripennis*. *Genetics.*  
583 1985;110:93–105.
- 584 27. Orzack SH, Parker ED, Gladstone J. The comparative biology of genetic variation for  
585 conditional sex ratio behavior in a parasitic wasp, *Nasonia vitripennis*. *Genetics.*  
586 1991;127:583–99.
- 587 28. Orzack S, Gladstone J. Quantitative genetics of sex ratio traits in the parasitic wasp,  
588 *Nasonia vitripennis*. *Genetics.* 1994;137:211–20.
- 589 29. Orzack SH. Sex-ratio control in a parasitic wasp, *Nasonia vitripennis*. II. Experimental  
590 analysis of an optimal sex-ratio model. *Evolution* (N Y). 1986;40:341. doi:10.2307/2408814.
- 591 30. Orzack SH, Parker ED. Sex-ratio control in a parasitic wasp, *Nasonia vitripennis*. I. Genetic  
592 variation in facultative sex-ratio adjustment. *Evolution* (N Y). 1986;40:331–40.  
593 doi:10.2307/2408813.
- 594 31. Nadeau NJ, Jiggins CD. A golden age for evolutionary genetics? Genomic studies of

- 595 adaptation in natural populations. *Trends in Genetics*. 2010;26:484–92.
- 596 32. Rockman M V. The QTN program and the alleles that matter for evolution: All that’s gold  
597 does not glitter. *Evolution*. 2012.
- 598 33. Jones FC, Grabherr MG, Chan YF, Russell P, Mauceli E, Johnson J, et al. The genomic basis of  
599 adaptive evolution in threespine sticklebacks. *Nature*. 2012;484:55–61.  
600 doi:10.1038/nature10944.
- 601 34. Wellenreuther M, Hansson B. Detecting Polygenic Evolution: Problems, Pitfalls, and  
602 Promises. *Trends Genet*. 2016;32:155–64. doi:10.1016/J.TIG.2015.12.004.
- 603 35. York RA. Assessing the Genetic Landscape of Animal Behavior. *Genetics*. 2018;209:223–  
604 32. doi:10.1534/genetics.118.300712.
- 605 36. Sella G, Barton NH. Thinking About the Evolution of Complex Traits in the Era of Genome-  
606 Wide Association Studies. *Annu Rev Genomics Hum Genet*. 2019;20:461–93.  
607 doi:10.1146/annurev-genom-083115-022316.
- 608 37. Hofmann HA. Functional Genomics of Neural and Behavioral Plasticity. *J Neurobiol*.  
609 2003;54:272–82. doi:10.1002/neu.10172.
- 610 38. Toro MA, Charlesworth B. An attempt to detect genetic variation in sex ratio in *Drosophila*  
611 *Melanogaster*. *Heredity (Edinb)*. 1982;49:199–209.
- 612 39. Carvalho AB, Sampaio MC, Varandas FR, Klaczko LB. An experimental demonstration of  
613 Fisher’s principle: Evolution of sexual proportion by natural selection. *Genetics*.  
614 1998;148:719–31.
- 615 40. Frohschammer S, Heinze J. A heritable component in sex ratio and caste determination in a  
616 *Cardiocondyla ant*. *Front Zool*. 2009;6.
- 617 41. Yusa Y. Genetics of sex-ratio variation inferred from parent-offspring regressions and sib  
618 correlations in the apple snail *Pomacea canaliculata*. *Heredity (Edinb)*. 2006;96:100–5.
- 619 42. Vandeputte M, Dupont-Nivet M, Merdy O, Haffray P, Chavanne H, Chatain B. Quantitative  
620 genetic determinism of sex-ratio in the European sea bass (*Dicentrarchus labrax* L.). IXth Int

- 621 Symp Genet Aquac Montpellier, June 26-30, 2006? B Abstr. 2006;:105.
- 622 43. Janzen FJ. Heritable variation for sex ratio under environmental sex determination in the  
623 common snapping turtle (*Chelydra serpentina*). *Genetics*. 1992;131:155–61.
- 624 44. Postma E, Heinrich F, Koller U, Sardell RJ, Reid JM, Arcese P, et al. Disentangling the effect  
625 of genes, the environment and chance on sex ratio variation in a wild bird population. *Proc R*  
626 *Soc B Biol Sci*. 2011;278:2996–3002. doi:10.1098/rspb.2010.2763.
- 627 45. Toro MA, Fernández A, García-Cortés LA, Rodrigáñez J, Silió L. Sex ratio variation in  
628 Iberian pigs. *Genetics*. 2006;173:911–7.
- 629 46. Gellatly C. Trends in Population Sex Ratios May be Explained by Changes in the  
630 Frequencies of Polymorphic Alleles of a Sex Ratio Gene. *Evol Biol*. 2009;36:190–200.  
631 doi:10.1007/s11692-008-9046-3.
- 632 47. Antolin MF. Sex ratio variation in a parasitic wasp I. Reaction norms. *Evolution (N Y)*.  
633 1992;46:1496–1510. doi:10.2307/2409953.
- 634 48. Antolin MF. Sex ratio variation in a parasitic wasp II. Diallel cross. *Evolution (N Y)*.  
635 1992;46:1511–24.
- 636 49. Kobayashi A, Tanaka Y, Shimada M. Genetic variation of sex allocation in the parasitoid  
637 wasp *Heterospilus prosopidis*. *Evolution (N Y)*. 2003;57:2659–64.
- 638 50. Henter HJ. Constrained sex allocation in a parasitoid due to variation in male quality. *J Evol*  
639 *Biol*. 2004;17:886–96.
- 640 51. Wajnberg E. Intra-population genetic variation in *Trichogramma*. In: Wajnberg E, Hassan  
641 SA, editors. *Biological control with egg parasitoids*. Wallingford: CAB International; 1994. p.  
642 245–71.
- 643 52. Orzack SH, Parker ED. Genetic variation for sex ratio traits within a natural population of a  
644 parasitic wasp, *Nasonia vitripennis*. *Genetics*. 1990;124:373–84.
- 645 53. Pannebakker BA, Trivedi U, Blaxter MA, Watt R, Shuker DM. The Transcriptomic Basis of  
646 Oviposition Behaviour in the Parasitoid Wasp *Nasonia vitripennis*. *PLoS One*. 2013;8.

- 647 54. Van De Zande L, Ferber S, De Haan A, Beukeboom LWLW, Van Heerwaarden J,  
648 Pannebakker BA. Development of a *Nasonia vitripennis* outbred laboratory population for  
649 genetic analysis. *Mol Ecol Resour.* 2014;14:578–87.
- 650 55. Stone EA. Joint genotyping on the fly: Identifying variation among a sequenced panel of  
651 inbred lines. *Genome Res.* 2012;22:966–74.
- 652 56. Hirschner W, Pogoda H-M, Kramer C, Thiess U, Hamprecht B, Wiesmüller K-H, et al.  
653 Biosynthesis of Wdr16, a marker protein for kinocilia-bearing cells, starts at the time of  
654 kinocilia formation in rat, and wdr16 gene knockdown causes hydrocephalus in zebrafish1. *J*  
655 *Neurochem.* 2007;101:274–88. doi:10.1111/j.1471-4159.2007.04500.x.
- 656 57. Amaral A, Paiva C, Attardo Parrinello C, Estanyol JM, Ballescà JL, Ramalho-Santos J, et al.  
657 Identification of proteins involved in human sperm motility using high-throughput differential  
658 proteomics. *J Proteome Res.* 2014;13:5670–84. doi:10.1021/pr500652y.
- 659 58. Davies NJ, Tauber E. WaspAtlas: a *Nasonia vitripennis* gene database and analysis  
660 platform. *Database.* 2015;2015:bav103. doi:10.1093/database/bav103.
- 661 59. Akbari OS, Antoshechkin I, Hay BA, Ferree PM. Transcriptome Profiling of *Nasonia*  
662 *vitripennis* Testis Reveals Novel Transcripts Expressed from the Selfish B Chromosome,  
663 Paternal Sex Ratio. *G3 Genes|Genomes|Genetics.* 2013;3:1597–605.  
664 doi:10.1534/g3.113.007583.
- 665 60. Verhulst EC, Beukeboom LW, Van De Zande L. Maternal control of haplodiploid sex  
666 determination in the wasp *Nasonia*. *Science (80- ).* 2010;328:620–3.
- 667 61. Shuker DM, Sykes EM, Browning LE, Beukeboom LW, West SA. Male influence on sex  
668 allocation in the parasitoid wasp *Nasonia vitripennis*. *Behav Ecol Sociobiol.* 2006;59:829–35.  
669 doi:10.1007/s00265-005-0129-1.
- 670 62. Martel V, Shuker DM, Boulton RA, Damiens D, Boivin G. Sex allocation and the evolution of  
671 insemination capacity under local mate competition. *Entomol Exp Appl.* 2016;159:230–42.  
672 doi:10.1111/eea.12435.

- 673 63. Harvey SE, Cheng C. Methods for Characterization of Alternative RNA Splicing. *Methods*  
674 *Mol Biol.* 2016;1402:229–41. doi:10.1007/978-1-4939-3378-5\_18.
- 675 64. Araujo PR, Yoon K, Ko D, Smith AD, Qiao M, Suresh U, et al. Before it gets started:  
676 Regulating translation at the 5′; UTR. *Comparative and Functional Genomics.* 2012;2012:1–8.  
677 doi:10.1155/2012/475731.
- 678 65. Wennerberg K, Rossman KL, Der CJ. The Ras superfamily at a glance. *J Cell Sci.* 2005;118 Pt  
679 5:843–6. doi:10.1242/jcs.01660.
- 680 66. Wei S, Xie C, Abe Y, Cai J. ADP-ribosylation factor like 7 (ARL7) interacts with  $\alpha$ -tubulin  
681 and modulates intracellular vesicular transport. *Biochem Biophys Res Commun.*  
682 2009;384:352–6. doi:10.1016/j.bbrc.2009.04.125.
- 683 67. Kahn RA, East MP, Francis JW. ARF-Like (ARL) Proteins. In: *Ras Superfamily Small G*  
684 *Proteins: Biology and Mechanisms 2.* Cham: Springer International Publishing; 2014. p. 215–  
685 51. doi:10.1007/978-3-319-07761-1\_10.
- 686 68. Jacobs S, Schürmann A, Becker W, Bockers TM, Copeland NG, Jenkins NA, et al. The mouse  
687 ADP-ribosylation factor-like 4 gene: Two separate promoters direct specific transcription in  
688 tissues and testicular germ cell. *Biochem J.* 1998;335:259–65. doi:10.1042/bj3350259.
- 689 69. Schurmann A, Kolling S, Jacobs S, Saftig P, Krau S, Wennemuth G, et al. Reduced Sperm  
690 Count and Normal Fertility in Male Mice with Targeted Disruption of the ADP-Ribosylation  
691 Factor-Like 4 (Arl4) Gene. *Mol Cell Biol.* 2002;22:2761–8. doi:10.1128/mcb.22.8.2761-  
692 2768.2002.
- 693 70. Green RF, Gordh G, Hawkins BA. Precise sex ratios in highly inbred parasitic wasps (*Goniozus-*  
694 *emigratus/gordhi*). *Am Nat.* 1982;120:653–65.
- 695 71. Nagelkerke CJ, Hardy ICW. The influence of developmental mortality on optimal sex  
696 allocation under local mate competition. *Behav Ecol.* 1994;5:401–11.  
697 doi:10.1093/beheco/5.4.401.
- 698 72. Pannebakker BA, Watt R, Knott SA, West SA, Shuker DM. The quantitative genetic basis of

- 699 sex ratio variation in *Nasonia vitripennis*: a QTL study. *J Evol Biol.* 2010;24:12–22.  
700 doi:10.1111/j.1420-9101.2010.02129.x.
- 701 73. Lynch JA, Werren JH, Alto NM, Kaeberlein M, Lange SK. The expanding genetic toolbox of  
702 the wasp *Nasonia vitripennis* and its relatives. *Genetics.* 2015;199:897–904.  
703 doi:10.1534/genetics.112.147512.
- 704 74. Werren JH, Richards S, Desjardins CA, Niehuis O, Gadau J, Colbourne JK, et al. Functional  
705 and evolutionary insights from the genomes of three parasitoid *Nasonia* species. *Science* (80-  
706 ). 2010;327:343–8.
- 707 75. Desjardins CA, Perfectti F, Bartos JD, Enders LS, Werren JH. The genetic basis of  
708 interspecies host preference differences in the model parasitoid *Nasonia*. *Heredity (Edinb).*  
709 2010;104:270–7. doi:10.1038/hdy.2009.145.
- 710 76. Niehuis O, Buellesbach J, Gibson JD, Pothmann D, Hanner C, Mutti NS, et al. Behavioural  
711 and genetic analyses of *Nasonia* shed light on the evolution of sex pheromones. *Nature.*  
712 2013;494:345–8. doi:10.1038/nature11838.
- 713 77. Davies NJ, Tauber E. Deep sequencing analysis of the circadian transcriptome of the jewel  
714 wasp *Nasonia vitripennis*. *bioRxiv.* 2016;:048736. doi:10.1101/048736.
- 715 78. Paolucci S, Dalla Benetta E, Salis L, Doležal D, van de Zande L, Beukeboom L. Latitudinal  
716 Variation in Circadian Rhythmicity in *Nasonia vitripennis*. *Behav Sci (Basel).* 2019;9:115.  
717 doi:10.3390/bs9110115.
- 718 79. Dalla Benetta E, Beukeboom LW, van de Zande L. Adaptive Differences in Circadian Clock  
719 Gene Expression Patterns and Photoperiodic Diapause Induction in *Nasonia vitripennis*. *Am*  
720 *Nat.* 2019;193:881–96. doi:10.1086/703159.
- 721 80. Rago A, Werren JH, Colbourne JK. Sex biased expression and co-expression networks in  
722 development, using the hymenopteran *Nasonia vitripennis*. *PLoS Genet.* 2020;16:e1008518.  
723 doi:10.1371/journal.pgen.1008518.
- 724 81. Cohen LB, Edwards R, Moody D, Arsala D, Werren JH, Lynch JA. Genetic, morphometric,

- 725 and molecular analyses of interspecies differences in head shape and hybrid developmental  
726 defects in the wasp genus *Nasonia*. *bioRxiv*. 2019;:663732.  
727 doi:<https://doi.org/10.1101/663732>.
- 728 82. Cook N, Pannebakker BA, Tauber E, Shuker DM. DNA methylation and sex allocation in the  
729 parasitoid wasp *Nasonia Vitripennis*. *Am Nat*. 2015;186:514–8.
- 730 83. Cook N, Parker DJ, Tauber E, Pannebakker BA, Shuker DM. Validating the demethylating  
731 effects of 5-aza-2'-deoxycytidine in insects requires a whole-genome approach: (A reply to  
732 ellers et al.). *American Naturalist*. 2019;194:432–8. doi:10.1086/704248.
- 733 84. Henter HJ. Inbreeding depression and haplodiploidy: Experimental measures in a  
734 parasitoid and comparisons across diploid and haplodiploid insect taxa. *Evolution* (N Y).  
735 2003;57:1793–803.
- 736 85. Mather KA, Caicedo AL, Polato NR, Olsen KM, McCouch S, Purugganan MD. The extent of  
737 linkage disequilibrium in rice (*Oryza sativa* L.). *Genetics*. 2007;177:2223–32.  
738 doi:10.1534/genetics.107.079616.
- 739 86. Hyten DL, Choi I-Y, Song Q, Shoemaker RC, Nelson RL, Costa JM, et al. Highly variable  
740 patterns of linkage disequilibrium in multiple soybean populations. *Genetics*. 2007;175:1937–  
741 44. doi:10.1534/genetics.106.069740.
- 742 87. MacKay TFC, Richards S, Stone EA, Barbadilla A, Ayroles JF, Zhu D, et al. The *Drosophila*  
743 *melanogaster* Genetic Reference Panel. *Nature*. 2012;482:173–8.
- 744 88. Wallberg A, Han F, Wellhagen G, Dahle B, Kawata M, Haddad N, et al. A worldwide survey  
745 of genome sequence variation provides insight into the evolutionary history of the honeybee  
746 *Apis mellifera*. *Nat Genet*. 2014;46:1081–8.
- 747 89. Niehuis O, Gibson JD, Rosenberg MS, Pannebakker BA, Koevoets T, Judson AK, et al.  
748 Recombination and its impact on the genome of the haplodiploid parasitoid wasp *Nasonia*.  
749 *PLoS One*. 2010;5.
- 750 90. Desjardins CA, Gadau J, Lopez JA, Niehuis O, Avery AR, Loehlin DW, et al. Fine-scale

- 751 mapping of the *Nasonia* genome to chromosomes using a high-density genotyping microarray.  
752 *G3 Genes, Genomes, Genet.* 2013;3:205–15.
- 753 91. Beukeboom LW, Niehuis O, Pannebakker BA, Koevoets T, Gibson JD, Shuker DM, et al. A  
754 comparison of recombination frequencies in intraspecific versus interspecific mapping  
755 populations of *Nasonia*. *Heredity (Edinb).* 2010;104:302–9.
- 756 92. Wallberg A, Glémin S, Webster MT. Extreme Recombination Frequencies Shape Genome  
757 Variation and Evolution in the Honeybee, *Apis mellifera*. *PLOS Genet.* 2015;11:e1005189.  
758 doi:10.1371/journal.pgen.1005189.
- 759 93. Grillenberger BK, Koevoets T, Burton-Chellew MN, Sykes EM, Shuker DM, Van De Zande L,  
760 et al. Genetic structure of natural *Nasonia vitripennis* populations: Validating assumptions of  
761 sex-ratio theory. *Mol Ecol.* 2008;17:2854–64.
- 762 94. Grillenberger BK, Gadau J, Bijlsma R, Van De Zande L, Beukeboom LW. Female dispersal  
763 and isolation-by-distance of *Nasonia vitripennis* populations in a local mate competition  
764 context. *Entomol Exp Appl.* 2009;132:147–54.
- 765 95. Davey JW, Hohenlohe PA, Etter PD, Boone JQ, Catchen JM, Blaxter ML. Genome-wide  
766 genetic marker discovery and genotyping using next-generation sequencing. *Nature Reviews*  
767 *Genetics.* 2011;12:499–510.
- 768 96. Narum SR, Buerkle CA, Davey JW, Miller MR, Hohenlohe PA. Genotyping-by-sequencing in  
769 ecological and conservation genomics. *Molecular Ecology.* 2013;22:2841–7.
- 770 97. White LC, Fonsere C, Lizano E, Hughes DA, Angedakin S, Arandjelovic M, et al. A roadmap  
771 for high-throughput sequencing studies of wild animal populations using noninvasive samples  
772 and hybridization capture. *Mol Ecol Resour.* 2019;19:609–22. doi:10.1111/1755-0998.12993.
- 773 98. Stapley J, Reger J, Feulner PGD, Smadja C, Galindo J, Ekblom R, et al. Adaptation genomics:  
774 the next generation. *Trends Ecol Evol.* 2010;25:705–12. doi:10.1016/J.TREE.2010.09.002.
- 775 99. Gienapp P, Calus MPL, Laine VN, Visser ME. Genomic selection on breeding time in a wild  
776 bird population. *Evol Lett.* 2019;3:142–51. doi:10.1002/evl3.103.



- 777 100. Bosse M, Spurgin LG, Laine VN, Cole EF, Firth JA, Gienapp P, et al. Recent natural selection  
778 causes adaptive evolution of an avian polygenic trait. *Science*. 2017;358:365–8.  
779 doi:10.1126/science.aal3298.
- 780 101. Whiting AR. The biology of the parasitic wasp *Mormoniella vitripennis* [=Nasonia  
781 vitripennis]. *Q Rev Biol*. 1967;42:333–406.
- 782 102. Maniatis T, Fritsch EF, Sambrook J. *Molecular cloning: a laboratory manual*. New York:  
783 Cold Spring Harbor Laboratory; 1982.
- 784 103. Li H, Durbin R. Fast and accurate short read alignment with Burrows-Wheeler transform.  
785 *Bioinformatics*. 2009;25:1754–60. doi:10.1093/bioinformatics/btp324.
- 786 104. Li H, Handsaker B, Wysoker A, Fennell T, Ruan J, Homer N, et al. The Sequence  
787 Alignment/Map format and SAMtools. *Bioinformatics*. 2009;25:2078–9.
- 788 105. Kofler R, Orozco-terWengel P, de Maio N, Pandey RV, Nolte V, Futschik A, et al.  
789 Popoolation: A toolbox for population genetic analysis of next generation sequencing data  
790 from pooled individuals. *PLoS One*. 2011;6.
- 791 106. R Development Core Team. *R: A language and environment for statistical computing*.  
792 2018.
- 793 107. Sul JH, Martin LS, Eskin E. Population structure in genetic studies: Confounding factors  
794 and mixed models. *PLoS Genet*. 2018;14:e1007309. doi:10.1371/journal.pgen.1007309.
- 795 108. Zhou W, Rousset F, O'Neill S. Phylogeny and PCR-based classification of *Wolbachia*  
796 strains using *wsp* gene sequences. *Proc R Soc B Biol Sci*. 1998;265:509–15.
- 797 109. Wajnberg E. Measuring genetic variation in natural enemies used for biological control:  
798 why and how? *Genet Evol Biol Control*. 2004;:19–37.  
799 doi:http://dx.doi.org/10.1079/9780851997353.0019.
- 800 110. Lynch M, Walsh B. *Genetics and analysis of quantitative traits*. Sinauer Assoc; 1998.
- 801 111. Hoffmann A, Parsons P. The analysis of quantitative variation in natural populations with  
802 isofemale strains. *Genet Sel Evol*. 1988;20:87. doi:10.1186/1297-9686-20-1-87.

- 803 112. Bates D, Mächler M, Bolker B, Walker S. Fitting Linear Mixed-Effects Models Using **lme4**. J  
804 Stat Softw. 2015;67:1–48. doi:10.18637/jss.v067.i01.
- 805 113. Wang M, Zhao Y, Zhang B. Efficient Test and Visualization of Multi-Set Intersections. Sci  
806 Rep. 2015;5:16923. doi:10.1038/srep16923.
- 807 114. Cingolani P, Platts A, Wang LL, Coon M, Nguyen T, Wang L, et al. A program for annotating  
808 and predicting the effects of single nucleotide polymorphisms, SnpEff: SNPs in the genome of  
809 *Drosophila melanogaster* strain w1118; iso-2; iso-3. Fly (Austin). 2012;6:80–92.  
810 doi:10.4161/fly.19695.
- 811

812 **Figures**

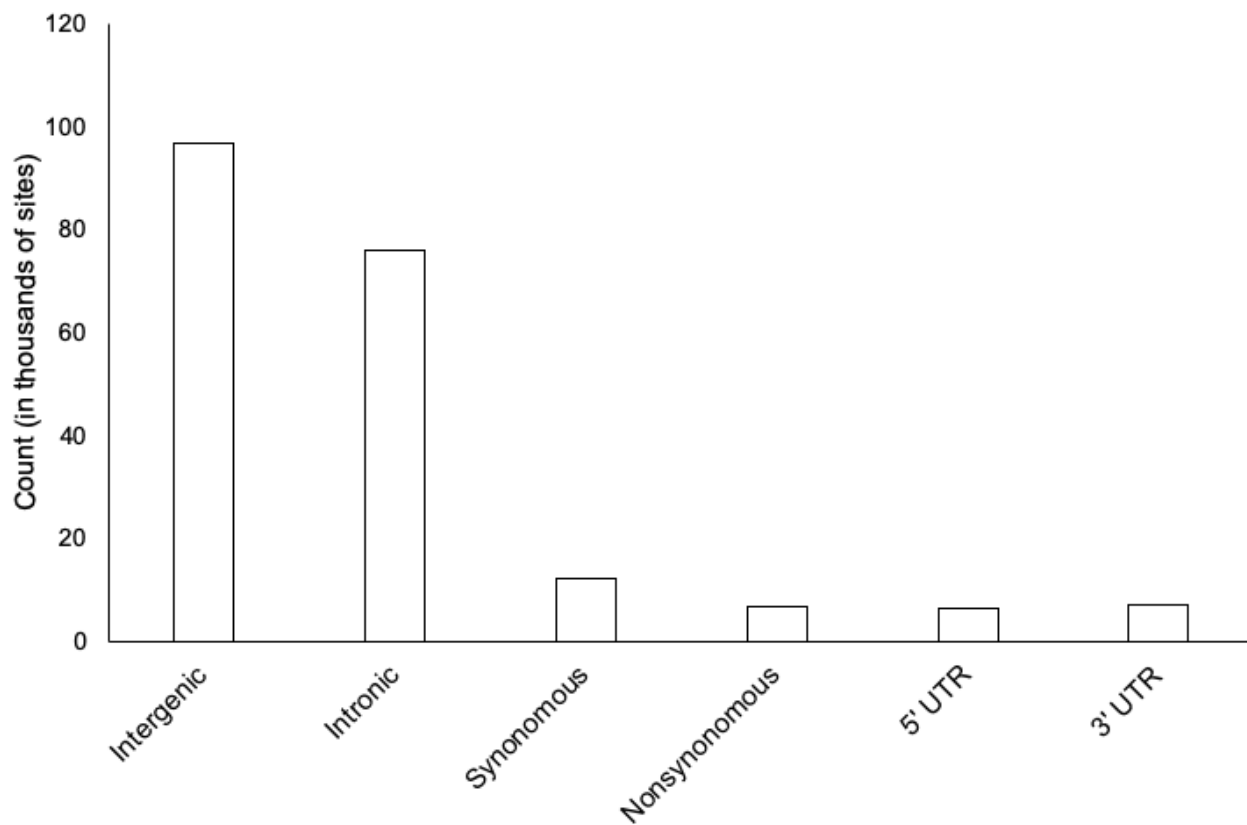

813

814 *Figure 1* SNP counts per site class. SNPs were attributed to only one class, according to the

815 SnpEff reporting order (most severe effects first; see [114]).

816

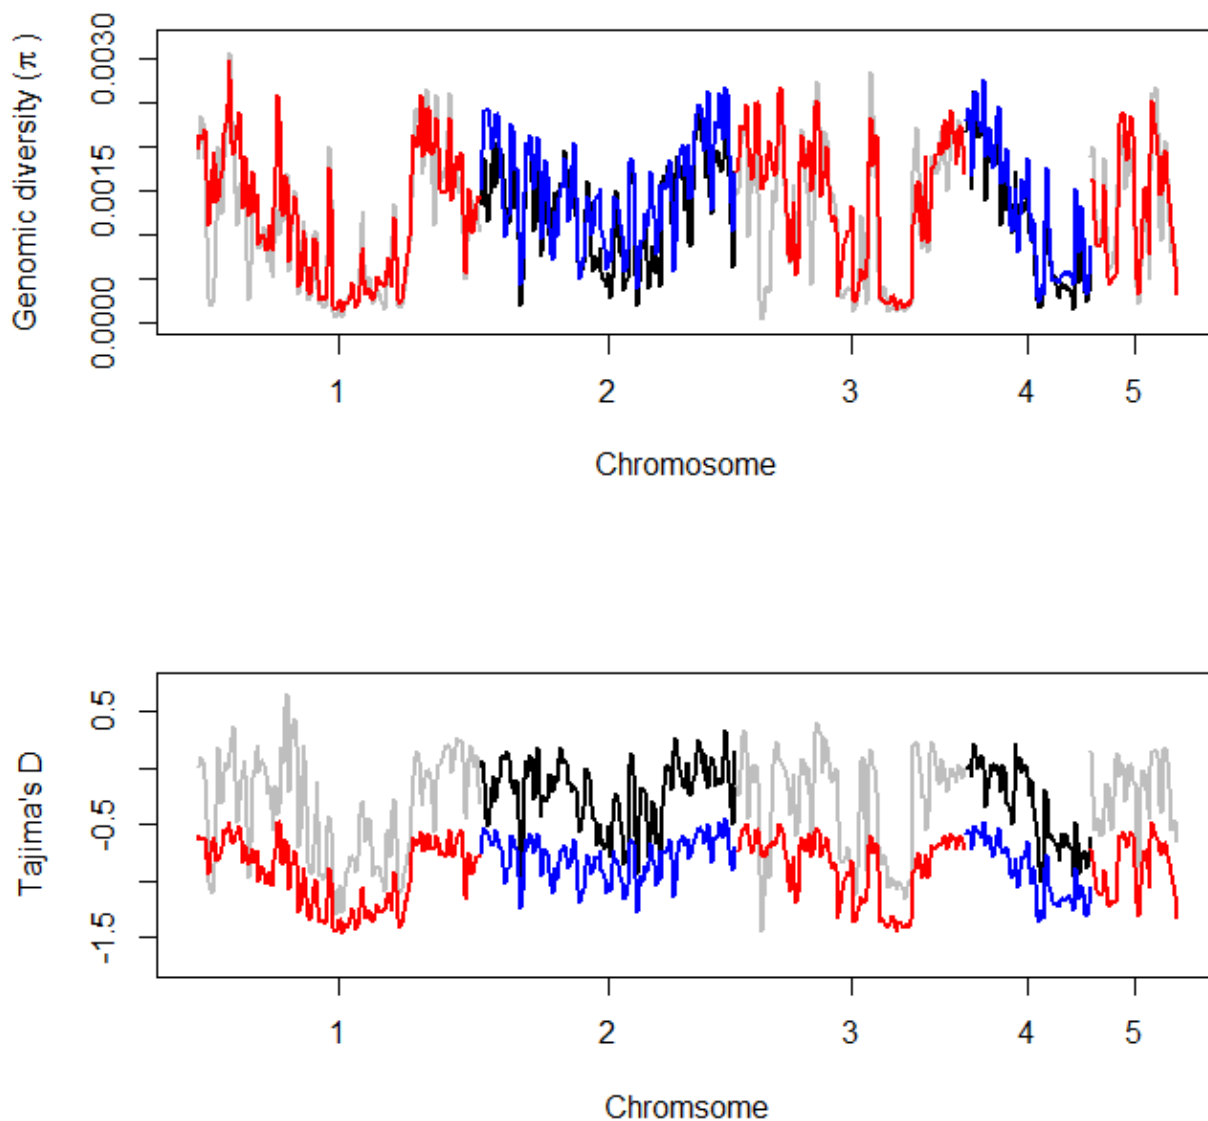

817

818 *Figure 2* Mean nucleotide diversity  $\pi$  (upper panel) and Tajima's D (lower panel) over 400 kb  
819 windows across the chromosomes in NVGRP (red and blue lines) and the HVRx laboratory  
820 outbred population (grey and black lines).

821

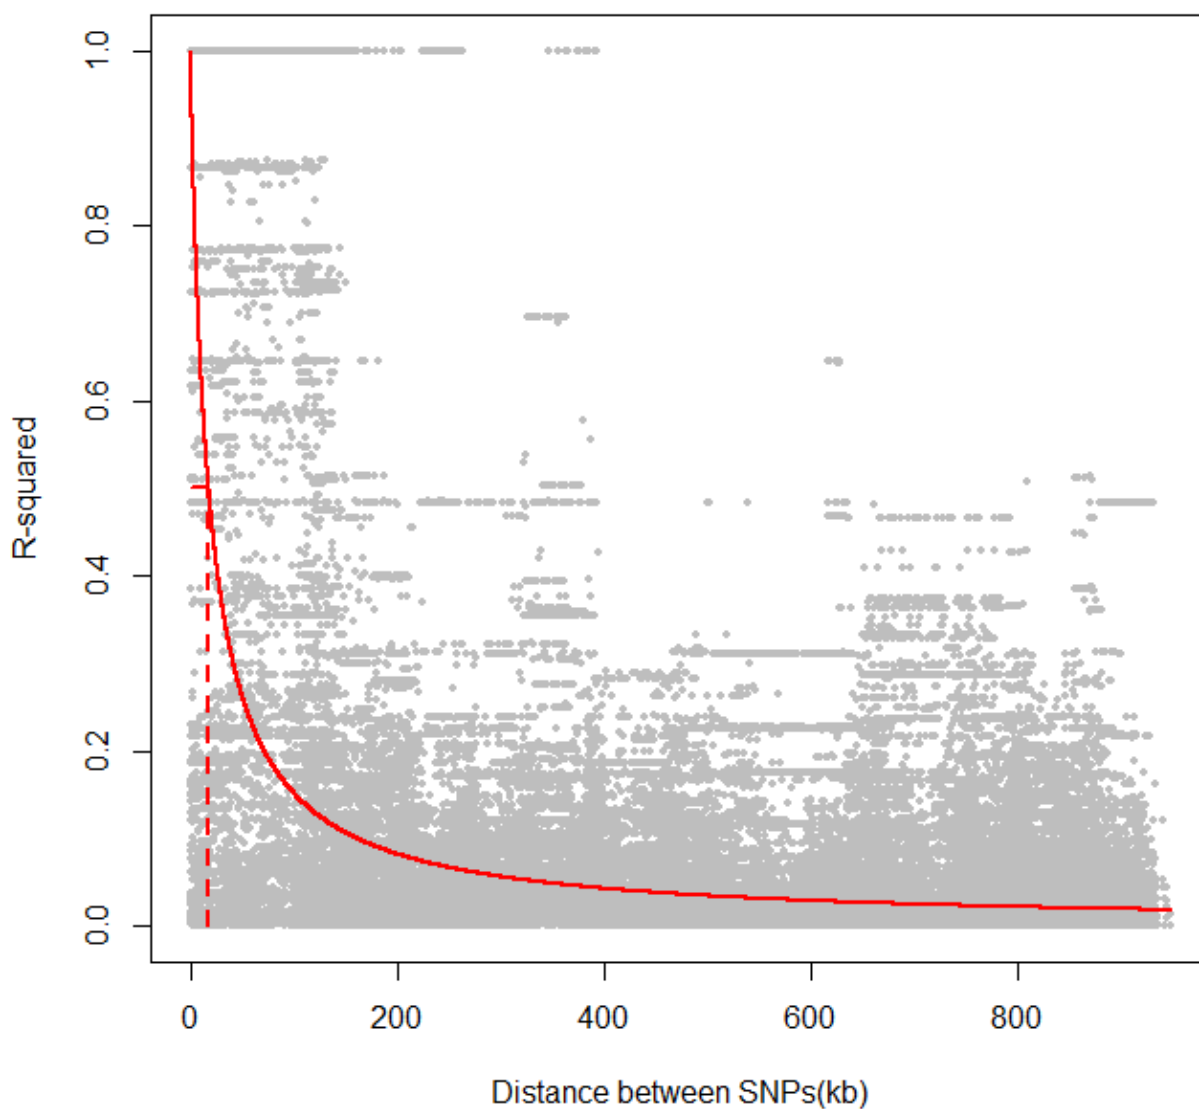

822

823 *Figure 3* Decay of linkage disequilibrium with physical distance. Dots shows the  $r^2$  among  
824 pairs of SNPs, red solid line gives the non-linear least squares fit of  $r^2$  on the distance between  
825 pairs of SNP. Dashed line indicates the half-decay LD distance at 17.8 kb.

826

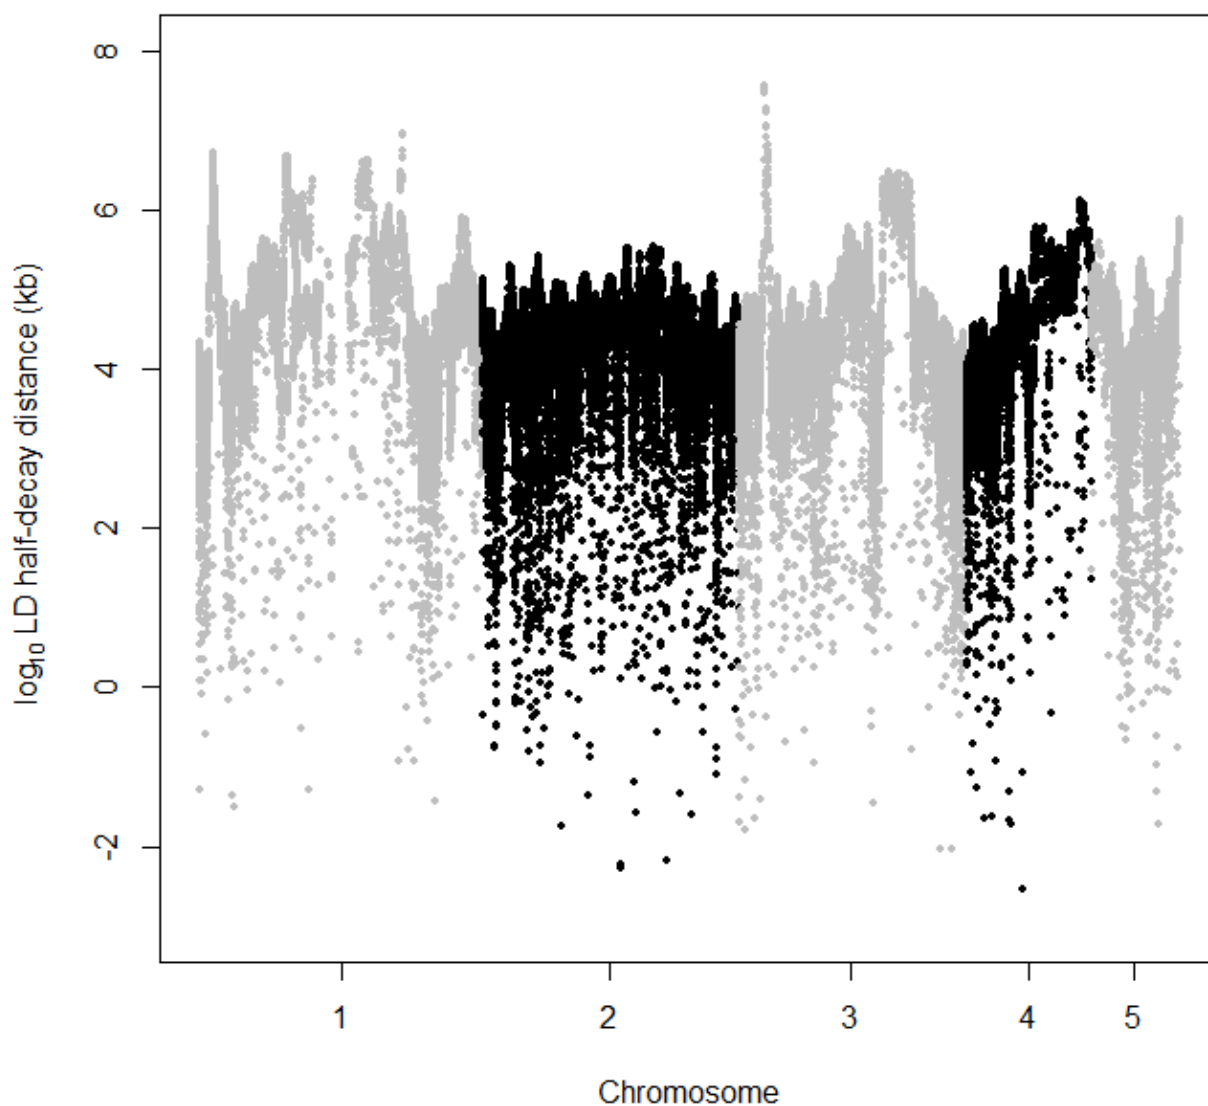

827

828 *Figure 4* Linkage disequilibrium half-decay distance across the genome. For each SNP on each  
829 of the five chromosomes, the log<sub>10</sub>(LD half-decay distance) is plotted.

830

831

832

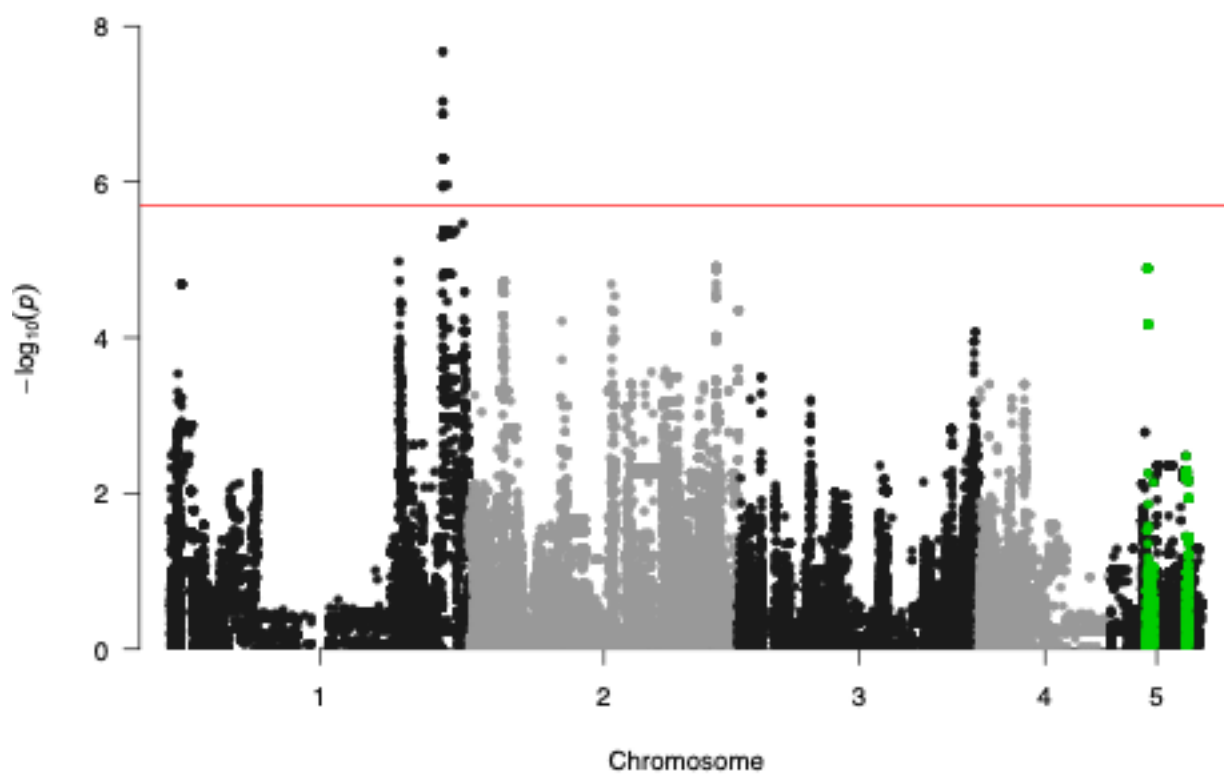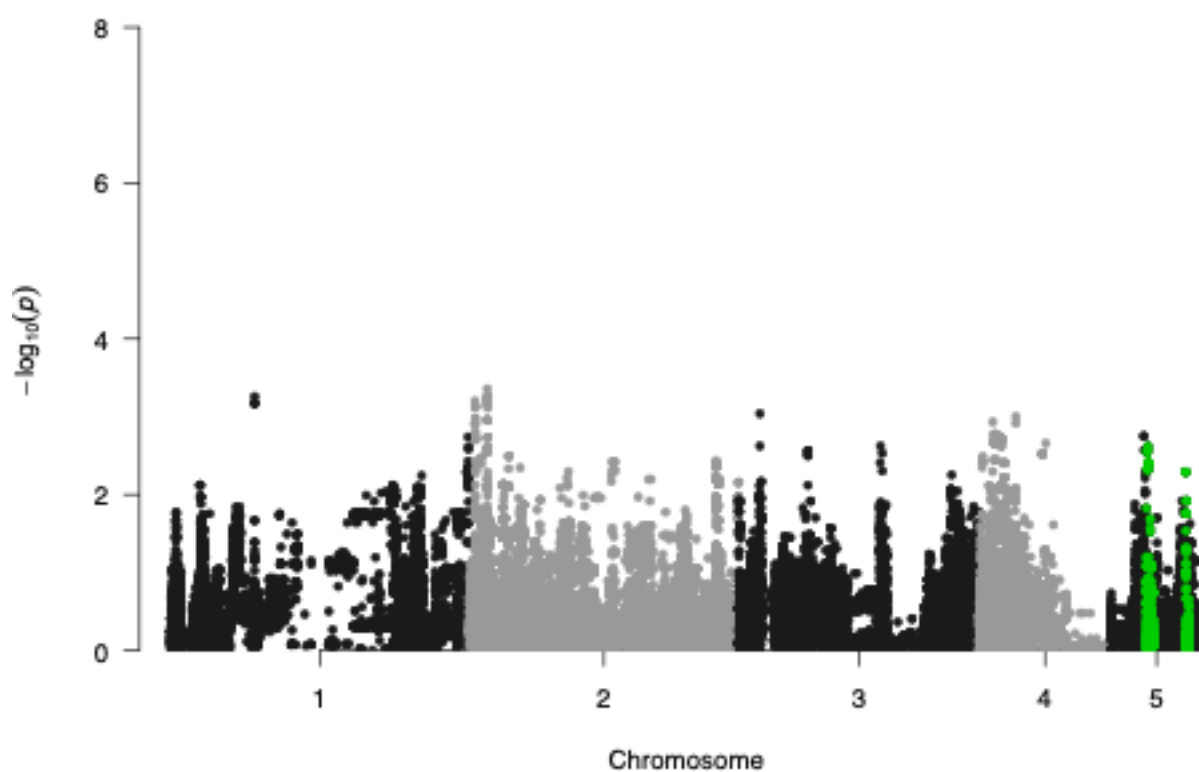

833

Figure 5 Manhattan plot for offspring sex ratio (top panel) and brood size (bottom panel) in *N.*

*vitripennis* in the GWAS experiment, showing  $-\log_{10}(P)$ -values of the single marker regressions for every polymorphic SNP across the chromosomes of the *N. vitripennis* Genetic Reference Panel (NVGRP). Red line indicates the empirical threshold at a q-value of 0.1, corresponding to  $P=2.00*10^{-6}$ , or  $-\log_{10}(P)= 5.70$  for sex ratio. Green highlighted SNPs show the 400kb windows in which the P-values for sex ratio and brood size overlap more than expected by chance.

834

835

836

837
